# Supplementary material for: In Silico Screening of Novel α1-GABAA Receptor PAMs towards Schizophrenia Based on Combined Modeling Studies of Imidazo [1,2-a]-Pyridines
Source: MDPI journal article supplement (doi:10.3390/ijms22179645), 2021-09-06
Supplement: s1 [file s1]

Table S1. Validation parameters of the pharmacophore model using a decoy set method.

|                                                       |         |
|-------------------------------------------------------|---------|
| number of active compounds in the hit list (Ha)       | 20      |
| number of all hit compounds (Ht)                      | 29      |
| number of active compounds in the database (A)        | 23      |
| number of compounds in the database (D)               | 3915    |
| enrichment factor (EF)                                | 117.398 |
| $[(Ha/Ht)/(A/D)]$                                     |         |
| Güner–Henry score (GH)                                | 0.734   |
| $[(Ha(3A + Ht)/4HtA) \times (1 - (Ht - Ha)/(D - A))]$ |         |

Table S2. The RMSF values of key residues of four complex systems in the 6X3X BZD site.

|                 | 6X3X-zolpidem (nm) | 6X3X- <b>14</b> (nm) | 6X3X- <b>DS03</b> (nm) | 6X3X- <b>DS04</b> (nm) |
|-----------------|--------------------|----------------------|------------------------|------------------------|
| Phe100 (loop A) | 0.057              | 0.067                | 0.050                  | 0.055                  |
| His102 (loop A) | 0.054              | 0.071                | 0.046                  | 0.051                  |
| Tyr160 (loop B) | 0.059              | 0.086                | 0.055                  | 0.056                  |
| Val203 (loop C) | 0.064              | 0.074                | 0.052                  | 0.057                  |
| Ser205 (loop C) | 0.068              | 0.058                | 0.047                  | 0.046                  |
| Ser206 (loop C) | 0.091              | 0.066                | 0.054                  | 0.042                  |
| Tyr210 (loop C) | 0.059              | 0.061                | 0.048                  | 0.050                  |
| Phe77 (loop D)  | 0.046              | 0.053                | 0.040                  | 0.042                  |
| Met130(loop E)  | 0.047              | 0.065                | 0.050                  | 0.060                  |
| Thr142(loop E)  | 0.059              | 0.064                | 0.056                  | 0.057                  |
